# Supplementary material for: New potential eukaryotic substrates of the mycobacterial protein tyrosine phosphatase PtpA: hints of a bacterial modulation of macrophage bioenergetics state
Source: PubMed Central journal article supplement (PMC5390082; doi:10.1038/srep08819), 2015-03-06
Supplement: srep08819-s1.pdf [file srep08819-s1.pdf]

## SUPPLEMENTARY FIGURES AND LEGENDS

### New potential eukaryotic substrates of the mycobacterial protein tyrosine phosphatase PtpA: hints of a bacterial modulation of macrophage bioenergetics state.

Mariana Margenat, Anne-Marie Labandera, Magdalena Gil, Federico Carrion, Marcela Purificação, Guilherme Razzera, María Magdalena Portela, Gonzalo Obal, Hernán Terenzi, Otto Pritsch, Rosario Durán, Ana María Ferreira, Andrea Villarino.

#### Supplementary Figure 1. Expression and purification of PtpA D126A.

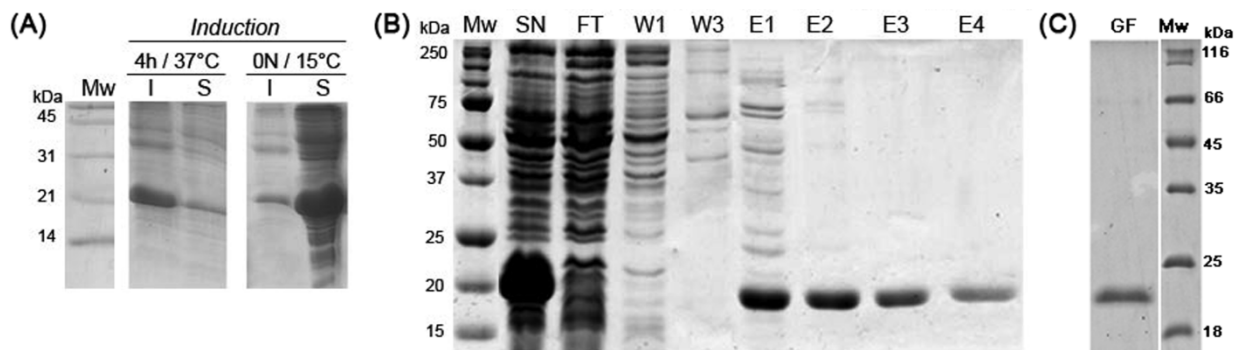

**(A)** SDS-PAGE (15% gel) analysis of PtpA expression in *E. coli* cells: insoluble fraction (I) and soluble fraction (S) after different conditions of induction.

**(B)** SDS-PAGE (15% gel) analysis showing the steps of PtpA D126A purification by affinity chromatography: supernatant applied to the Chelating Sepharose Fast Flow matrix (SN); flow through (FT); washes (W1-W3); four successive eluates with 300 mM imidazole (E1-E4).

**(C)** SDS-PAGE (15% gel) analysis showing PtpA D126A after SEC onto a Superdex 200 16/60 preparative grade column (GE Healthcare). Mw, molecular weight marker. All gels were stained with Coomassie Brilliant Blue R-250. Results are representative of three biological replicates performed with different batches of purified protein.

**Details of the methodology:** the coding sequence of PtpA from *Mtb* was amplified by PCR from the cosmid MTCY427, using a forward primer including NdeI restriction site (5'-GGGAGGCGCCATATGTCTGATCC-3') and a reverse primer containing a HindIII restriction site (5'-CCTGGCTCAATTCGAAGGCGGATC-3'). The oligonucleotide used to mutate aspartate 126 to alanine in PtpA was 5'-GCTCGATGTGAGGCTCCCTACTATGGCG-3' (the underlined bases indicate the alteration to encode alanine rather than aspartate). *Escherichia coli* strain BL21(DE3) was separately transformed with pET28a-PtpA WT or pET28a-PtpA D126A plasmid to produce recombinant His-tagged proteins. Transformants were grown overnight in 10 ml of Lysogeny broth (LB) containing 50  $\mu\text{g ml}^{-1}$  kanamycin at 37 °C. For protein expression, 0.5 ml of overnight culture were transferred into 500 ml of LB and grown at 37°C with agitation (140 rpm) up to the end of exponential phase of growth, corresponding to an optical density of 0.6 at 600 nm. Then, for induction of protein synthesis a final concentration of 0.5 mM isopropyl- $\beta$ -D-thiogalactopyranoside (IPTG) was added. To optimize the production of soluble recombinant proteins cultures were incubated overnight at 15 °C or 4 h at 37 °C. Cells were then harvested by centrifugation at 5,000 xg for 30 min, and the pellet was resuspended in cold lysis buffer (20 mM Tris-HCl pH 8.0, 0.5 M

NaCl, 10 mM imidazole, 10% glycerol) containing EDTA-free protease inhibitor cocktail (Amersham Biosciences). Cells were then lysed by sonication on ice (Fisher Scientific Model 60 Sonic Dismembrator) and subsequently centrifuged at 12,000  $\times g$  for 1 h at 4 °C. His-tagged recombinant proteins were purified from the supernatant by immobilized Cu-affinity chromatography. Briefly, the supernatant was incubated for 40 min at room temperature under agitation with 3 ml of Chelating Sepharose Fast Flow (GE Healthcare, Uppsala, Sweden) previously activated with 0.1 M  $\text{CuSO}_4$  and equilibrated in lysis buffer, following the manufacturer's instructions. The unbound protein was removed with three washes (W1, W2, W3) of five bed volumes of lysis buffer containing 10 mM, 20 mM, and 30 mM imidazole, respectively. Then, the recombinant protein bound to the matrix was eluted in five steps with two bed volumes of lysis buffer containing 300 mM imidazole. Fractions were analysed by SDS-PAGE and those containing purified recombinant protein were pooled and dialyzed at 4 °C in four steps for 2 h against the elution buffer with decreasing concentrations of imidazole (150 mM, 75 mM, 35 mM and without imidazole). The last dialysis buffer contained 20 mM Tris-HCl pH 8.0, 50 mM NaCl, 5 mM EDTA, 10% glycerol, 5 mM DTT. Then, proteins were concentrated by ultrafiltration with a 10 kDa pore membrane (Amicon Ultra-15 Millipore) and stored at -20 °C. Protein concentration was determined by Bradford assay using bovine serum albumin as standard. To further purify PtpA WT and PtpA D126A and separate aggregate species from monomeric PtpA, a further step of purification by size exclusion chromatography (SEC) was performed in an AKTA Basic system (GE Healthcare). For preparative SEC, samples of 5 ml of dialyzed protein (5 mg) were injected in a Superdex 200 16/60 preparative grade column (GE Healthcare). Elution was carried out with two bed column volumes of the equilibration buffer (last dialysis buffer) and fractions containing the recombinant protein PtpA were pooled, concentrated by centrifugation, supplemented with 20 mM DTT final concentration and the aliquots stored at -20°C. The amount of pure PtpA, as mg per liter of culture was expressed as mean  $\pm$  standard deviation of three independent experiments of protein purification.

## Supplementary Figure 2.

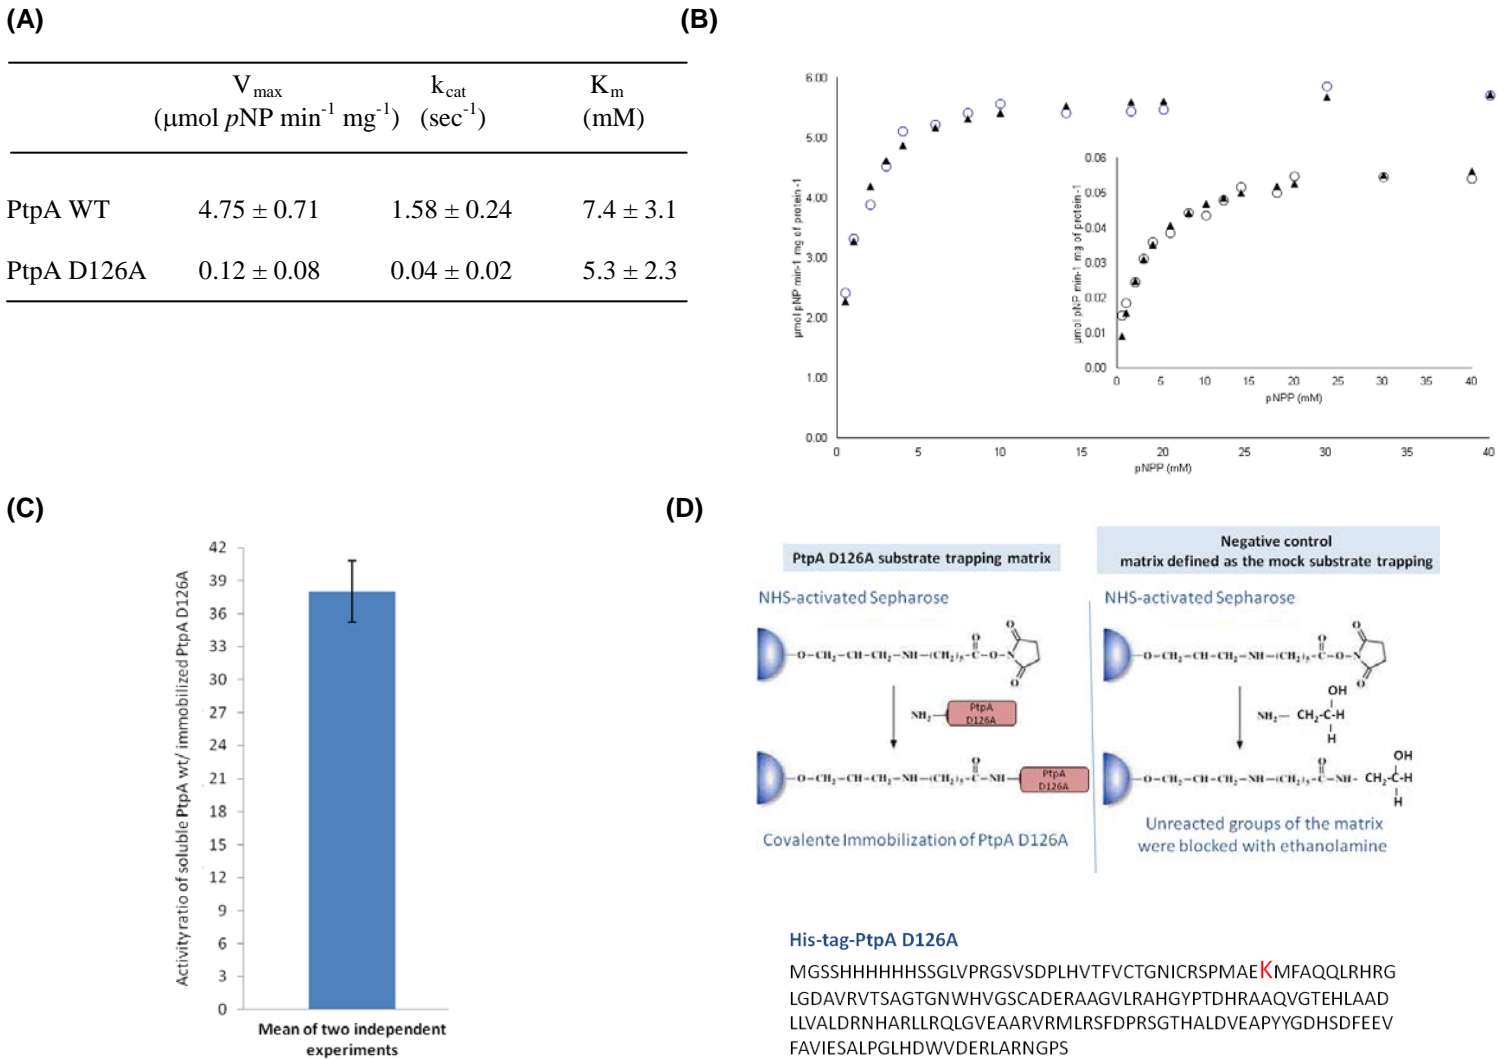

**(A)** Kinetic parameters values of *M. tuberculosis* PtpA wt and PtpA D126A expressed as mean  $\pm$  standard deviation of three independent experiments realized with different batches of purified protein.

**(B)** One example of the Michaelis-Menten representation of one batch of purified PtpA wt and PtpA D126A. White circles represent the experimental data and black circles represent the best fit curve to the Michaelis-Menten equation used to determine the  $K_m$  and  $V_{\max}$  values. Reaction rates of PtpA wt and PtpA D126A (inset) are expressed as specific activity ( $\mu\text{moles pNP min}^{-1} \text{mg}^{-1}$  of protein). The  $k_{\text{cat}}$  was calculated with the equation  $k_{\text{cat}} = V_{\max}/E_0$ , with  $V_{\max}$  values as  $\mu\text{M pNP sec}^{-1}$  and  $E_0$  as  $\mu\text{M}$  of PtpA wt or PtpA D126A.

**(C)** Activity ratio of the soluble PtpA wt respect to the immobilized PtpA D126A. The activity of equal amount of soluble PtpA wt and immobilized PtpA D126A was evaluated by an endpoint assay in conditions of  $V_{\max}$  (using 30 mM of pNPP). The whole amount of protein offered to the matrix was immobilized. In these conditions, if all PtpA D126A activity is retained after immobilization, the activity ratio of soluble PtpA wt/ immobilized PtpA D126A is expected to be 40. The obtained result confirmed that the immobilized PtpA D126A retained its activity. The results represent the mean ratio from two independent experiments of immobilization.

**(D)** Diagram showing the strategy used for covalent immobilization of PtpA D126A and the matrix used as a negative control. We also showed the sequence of PtpA D126A indicating in red the only lysine (K) residue, involved in the unipuntual immobilization of the phosphatase to the NHS activated sepharose.

**Supplementary Figure 3.** Real time association-dissociation sensograms obtained by SPR of macrophage protein extract.

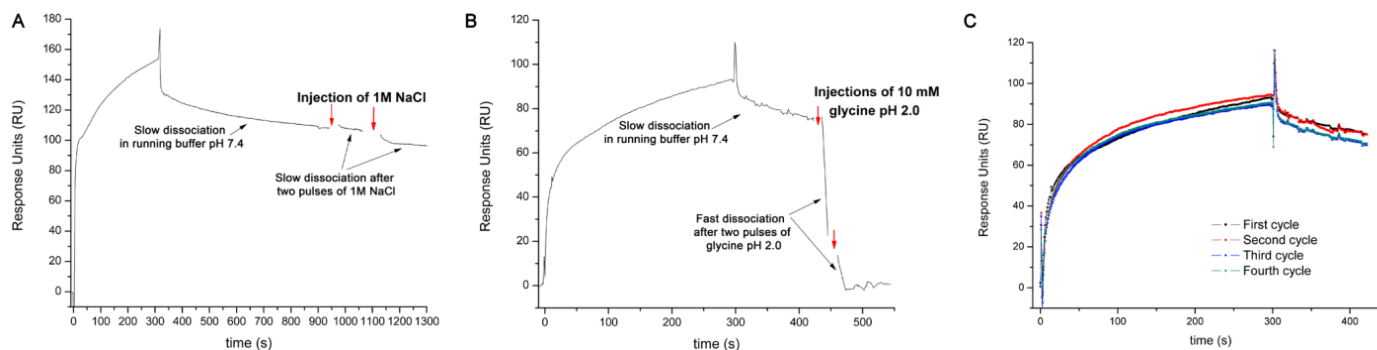

**(A)** Effect in the dissociation rate of two 30 second pulses of 1.0 M NaCl.

**(B)** Effect in the dissociation rate after two 40 second pulses of 10 mM glycine pH 2.0.

**(C)** Association-dissociation curves after four cycles of injection of macrophage protein extract followed by 10 mM glycine pH 2.0.

**Supplementary Figure 4.** Immunodetection of tyrosine phosphorylated proteins.

**(A)**

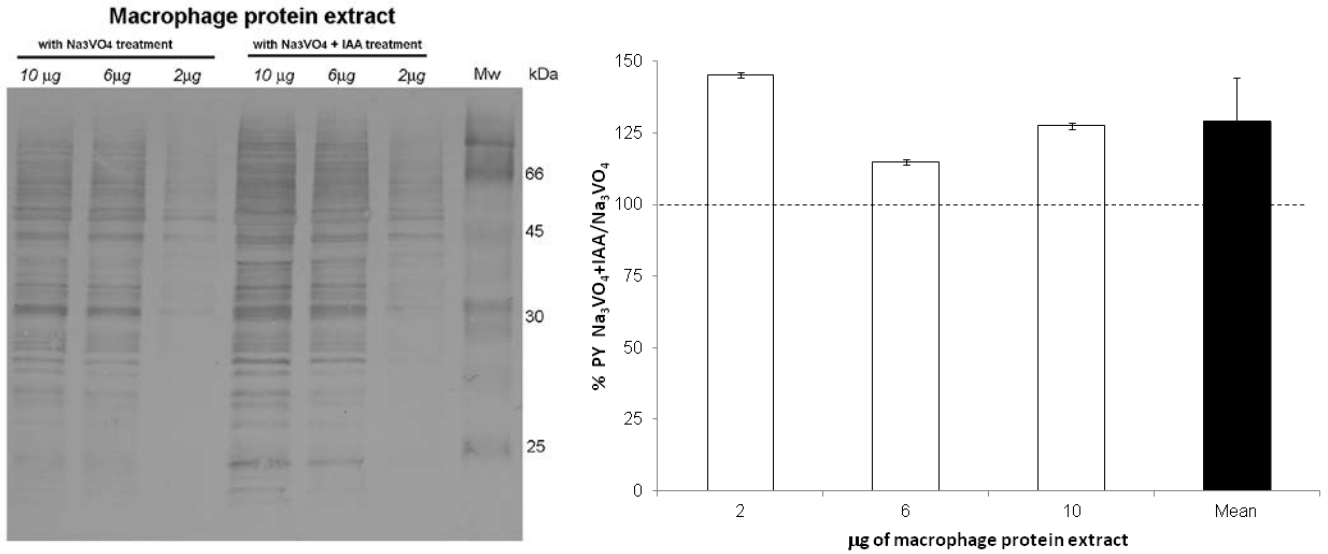

**(B)**

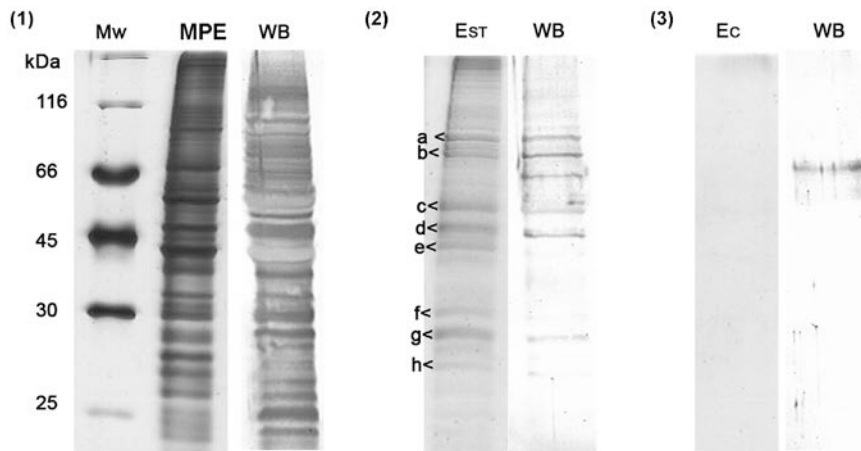

**(A)** Immunodetection of tyrosine phosphorylated proteins in P-Y enriched protein extracts. Protein concentration was determined by Bradford assay. Samples containing 2, 6 and 10 µg of the macrophage protein extract treated with Na<sub>3</sub>VO<sub>4</sub> or with Na<sub>3</sub>VO<sub>4</sub> + IAA were separated by SDS-PAGE and transferred to nitrocellulose membranes during 1 h at 100V. The membrane was blocked with Membrane Blocking Solution (Invitrogen) 16 hs at 4 °C and then washed twice with Tris buffered saline pH 7.4, 0.1% tween 20 (TBS-T) followed by incubation with PY Plus Mouse Anti-P Tyr Ab (Invitrogen #136600) at 0.6 µg/mL in TBS-T for 1 hour at RT with gentle agitation. After three washes with TBS-T the membrane was incubated for 1 h at RT with anti-mouse antibody conjugated with alkaline phosphatase (Calbiochem) diluted 1/400 in TBS-T. After washes with TBS-T the reaction was developed with a NBT/BCIP solution (Sigma). The graph shows the P-Y levels (%) of the macrophage protein extract treated with Na<sub>3</sub>VO<sub>4</sub> + IAA respect to the extract treated with Na<sub>3</sub>VO<sub>4</sub>, quantified with the GBOX ChemiSystem tool (SynGene) using the raw volume as index of the signal. The analysis shows that the treatment with Na<sub>3</sub>VO<sub>4</sub> + IAA determined an increase of 29% in the level of P-Y signal.

**(B)** SDS-PAGE and immunodetection of P-Y proteins:

(1) macrophage protein extract (MPE) and the respective Western blot (WB);

(2) fraction eluted in the substrate trapping with PtpA D126A ( $E_{ST}$ ) and the respective WB. Letters a to h indicate bands which were cut and proteins identified by MALDI-TOF MS (Table 1);

(3) fraction eluted in the mock substrate trapping using the matrix without immobilized PtpA D126A ( $E_C$ ) and the respective WB. The PY signal observed in the WB does not correspond to a visible band in the silver stained gel.

**Supplementary Figure 5.** Analysis by SPR of the interaction between PtpA wt with TFP.

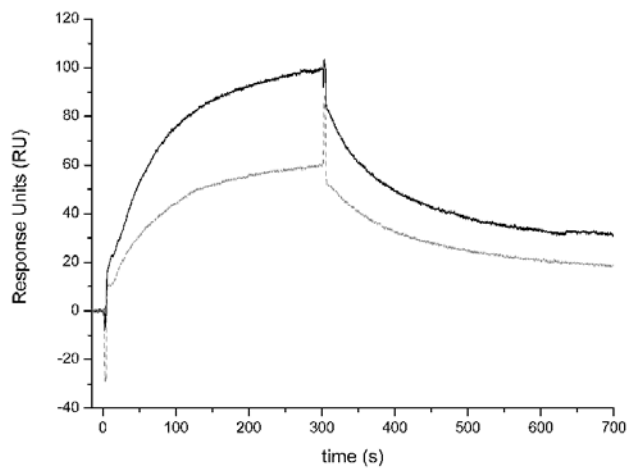

Real time association-dissociation sensograms of PtpA wt with immobilized TFP. PtpA wt injections of 20 µg (black line) and 10 µg (gray line) diluted in running buffer at 25°C and a flow rate of 40 µl/min.

**Supplementary Table 1.** Proteins identified by Nano-LC MS in mock control experiments

| <b>Protein accession</b>  | <b>Protein name</b>                                        |
|---------------------------|------------------------------------------------------------|
| K2C1_HUMAN                | Keratin, type II cytoskeletal 1                            |
| K1C9_HUMAN                | Keratin, type I cytoskeletal 9                             |
| K1C10_HUMAN               | Keratin, type I cytoskeletal 10                            |
| K22E_HUMAN                | Keratin, type II cytoskeletal 2 epidermal                  |
| K2C6B_HUMAN               | Keratin, type II cytoskeletal 6B                           |
| K1C14_HUMAN               | Keratin, type I cytoskeletal 14                            |
| K1C16_HUMAN               | Keratin, type I cytoskeletal 16                            |
| K2C5_HUMAN                | Keratin, type II cytoskeletal 5                            |
| TBA1A_HUMAN               | Tubulin alpha-1A chain                                     |
| TBA1B_HUMAN               | Tubulin alpha-1B chain                                     |
| TBA1C_HUMAN               | Tubulin alpha-1C chain                                     |
| TBB4A_HUMAN               | Tubulin beta-4A chain                                      |
| TBB4B_HUMAN               | Tubulin beta-4B chain                                      |
| TBB5_HUMAN                | Tubulin beta chain                                         |
| TBB3_HUMAN                | Tubulin beta-3 chain                                       |
| ACTA_HUMAN                | Actin, aortic smooth muscle                                |
| ACTB_HUMAN                | Actin, cytoplasmic 1                                       |
| ACTC_HUMAN                | Actin, alpha cardiac muscle 1                              |
| ACTG_HUMAN                | Actin, cytoplasmic 2                                       |
| ACTH_HUMAN                | Actin, gamma-enteric smooth muscle                         |
| ACTS_HUMAN                | Actin, alpha skeletal muscle                               |
| HSP7C_HUMAN               | Heat shock cognate 71 kDa protein                          |
| HS90_HUMAN <sup>†</sup>   | Heat shock protein HSP-90 beta                             |
| VDAC1_HUMAN               | Voltage-dependent anion-selective channel protein 1        |
| RS3_HUMAN                 | 40S ribosomal protein S3                                   |
| POTEF_HUMAN               | POTE ankyrin domain family member F                        |
| POTEE_HUMAN               | POTE ankyrin domain family member                          |
| TRY1/TRY2/TRY3/TRY6_HUMAN | Trypsin-1/ Trypsin-2/ Trypsin-3/ Trypsin-6                 |
| CDK4_HUMAN                | Cyclin-dependent kinase 4                                  |
| MESP2_HUMAN               | Mesoderm posterior protein 2                               |
| EPCAM_HUMAN               | Epithelial cell adhesion molecule                          |
| RECK_HUMAN                | Reversion-inducing cysteine-rich protein with Kazal motifs |



**Supplementary Table 2. Proteins identified by Nano-LC-MS in the substrate trapping experiments.**

| Proteins identified in three biological replicates of substrate trapping |                          |                                                                 |                           |           |                                  |                                       |
|--------------------------------------------------------------------------|--------------------------|-----------------------------------------------------------------|---------------------------|-----------|----------------------------------|---------------------------------------|
| Biological process <sup>a</sup>                                          | Protein accession        | Protein name                                                    | Mascot score <sup>b</sup> | Mass (Da) | No. of matched ions <sup>b</sup> | No. of peptide sequences <sup>b</sup> |
| <i>Lipid metabolism, fatty acid beta-oxidation</i>                       | ECHA_HUMAN               | Trifunctional enzyme subunit alpha, mitochondrial               | 2422                      | 82947     | 63                               | 23                                    |
| <i>Sulfide oxidation</i>                                                 | SQRD_HUMAN               | Sulfide:quinone oxidoreductase, mitochondrial                   | 705                       | 49929     | 28                               | 10                                    |
| <i>Respiratory electron transport chain</i>                              | ATPA_HUMAN               | ATP synthase subunit $\alpha$ , mitochondrial                   | 531                       | 59714     | 16                               | 7                                     |
| <i>Glycolysis</i>                                                        | K6PP_HUMAN               | 6-phosphofructokinase, platelet type                            | 922                       | 85542     | 47                               | 15                                    |
|                                                                          | K6PL_HUMAN               | 6-phosphofructokinase, liver type                               | 567                       | 84964     | 20                               | 9                                     |
| Proteins identified in two biological replicates of substrate trapping   |                          |                                                                 |                           |           |                                  |                                       |
| <i>Lipid metabolism</i>                                                  | GLCM_HUMAN               | Glucosylceramidase                                              | 806                       | 59678     | 19                               | 12                                    |
|                                                                          | ECHB_HUMAN               | Trifunctional enzyme subunit beta, mitochondrial                | 211                       | 51262     | 5                                | 4                                     |
| <i>Signal transduction</i>                                               | CAP1_HUMAN               | Adenylyl cyclase-associated protein                             | 485                       | 51869     | 12                               | 6                                     |
|                                                                          | ZYX_HUMAN                | Zyxin                                                           | 232                       | 61238     | 4                                | 3                                     |
| <i>Respiratory electron transport chain</i>                              | CY1_HUMAN                | Cytochrome c1, heme protein, mitochondrial                      | 333                       | 35399     | 11                               | 4                                     |
|                                                                          | ATPB_HUMAN               | ATP synthase subunit $\beta$ , mitochondrial                    | 274                       | 56525     | 8                                | 4                                     |
|                                                                          | ATPO_HUMAN               | ATP synthase subunit O , mitochondrial                          | 251                       | 23263     | 6                                | 4                                     |
|                                                                          | ATP5H_HUMAN              | ATP synthase subunit d, mitochondrial                           | 124                       | 18480     | 3                                | 3                                     |
| <i>Protein folding, transport and/or synthesis</i>                       | GRP78_HUMAN              | 78 kDa glucose-regulated protein or Heat shock 70 kDa protein   | 929                       | 72288     | 21                               | 13                                    |
|                                                                          | GRP75_HUMAN              | 75 kDa glucose-regulated protein or Heat shock 70 kDa protein 9 | 199                       | 73635     | 4                                | 3                                     |
|                                                                          | CH60_HUMAN               | 60 kDa heat shock protein, mitochondrial                        | 458                       | 61016     | 8                                | 7                                     |
|                                                                          | HSPB1_HUMAN              | Small heat shock protein Hsp25/27                               | 210                       | 22768     | 4                                | 3                                     |
|                                                                          | COPE_HUMAN               | Coatomer subunit epsilon                                        | 131                       | 34460     | 3                                | 2                                     |
|                                                                          | EF1A1_HUMAN <sup>c</sup> | Elongation factor 1-alpha 1                                     | 258                       | 50109     | 9                                | 5                                     |
| <i>Nucleic acid binding</i>                                              | SSBP_HUMAN               | Single-stranded DNA-binding protein, mitochondrial              | 312                       | 17249     | 6                                | 3                                     |

<sup>a</sup> Only the main biological processes of each protein with traceable author statement are shown, from UniProt (<http://www.uniprot.org>) database (released on January 2014) [60].

<sup>b</sup> The value of score, number of matched ions and peptide sequences indicated is the best value obtained from three biological replicates

<sup>c</sup> EF1A3\_HUMAN was also identified with the same set of peptides

The MPCP\_HUMAN (identified by MALDI-TOF-MS in gel bands) was excluded from the table as it was identified by Nano-LC-MS only with one peptide (in two experiments).

**Supplementary Table 3. Nano-LC-MS/MS and Mascot search results for putative PtpA substrates.**

| ECHA_HUMAN Trifunctional enzyme subunit alpha, mitochondrial |       |              |                   |       |         |          |         |       |      |            |      |                                                |
|--------------------------------------------------------------|-------|--------------|-------------------|-------|---------|----------|---------|-------|------|------------|------|------------------------------------------------|
| Score                                                        | Mass  | Matched ions | Peptide sequences | Dupes | m/z obs | M exp    | M calc  | Delta | Miss | Pept score | Rank | U Peptide                                      |
| 2426                                                         | 82947 | 63           | 23                | 1     | 418.47  | 834.92   | 833.44  | 1.48  | 0    | 44         | 1    | U R.GQQQVFK.G                                  |
|                                                              |       |              |                   |       | 435.15  | 868.29   | 867.44  | 0.84  | 0    | 43         | 1    | U K.HVAEDLGK.V                                 |
|                                                              |       |              |                   | 1     | 470.62  | 939.23   | 939.47  | -0.24 | 0    | 51         | 1    | U K.FGELVMTK.E + Oxidation (M)                 |
|                                                              |       |              |                   | 1     | 521.38  | 1040.75  | 1039.53 | 1.22  | 0    | 60         | 1    | U R.FVDLYGAQK.I                                |
|                                                              |       |              |                   | 3     | 559.74  | 1117.46  | 1117.60 | -0.13 | 0    | 79         | 1    | U K.DTSASAVAVGLK.Q                             |
|                                                              |       |              |                   | 2     | 602.23  | 1202.45  | 1202.60 | -0.15 | 0    | 65         | 1    | U K.GFYIQEGVK.R                                |
|                                                              |       |              |                   | 1     | 660.15  | 1318.28  | 1317.72 | 0.56  | 0    | 75         | 1    | U K.MQLLEITTEK.T                               |
|                                                              |       |              |                   | 1     | 668.06  | 1334.11  | 1333.72 | 0.40  | 0    | 81         | 1    | U K.MQLLEITTEK.T + Oxidation (M)               |
|                                                              |       |              |                   | 1     | 696.66  | 1391.30  | 1391.69 | -0.40 | 0    | 73         | 1    | U K.VIGMHYFSPVDK.M                             |
|                                                              |       |              |                   | 1     | 705.52  | 1409.03  | 1407.69 | 1.34  | 0    | 72         | 1    | U K.VIGMHYFSPVDK.M + Oxidation (M)             |
|                                                              |       |              |                   | 1     | 761.52  | 1521.03  | 1520.74 | 0.29  | 0    | 106        | 1    | U K.DLNSDMDSILASLK.L                           |
|                                                              |       |              |                   |       | 781.64  | 1561.27  | 1560.78 | 0.49  | 0    | 98         | 1    | U K.MVGVPAALDMMMLTGR.S                         |
|                                                              |       |              |                   | 1     | 789.42  | 1576.83  | 1576.78 | 0.05  | 0    | 67         | 1    | U K.MVGVPAALDMMMLTGR.S + Oxidation (M)         |
|                                                              |       |              |                   | 1     | 789.58  | 1577.14  | 1576.78 | 0.37  | 0    | 90         | 1    | U K.MVGVPAALDMMMLTGR.S + Oxidation (M)         |
|                                                              |       |              |                   |       | 789.62  | 1577.23  | 1576.79 | 0.44  | 0    | 117        | 1    | U R.FGGGNPELLTQMVSK.G                          |
|                                                              |       |              |                   | 1     | 797.57  | 1593.13  | 1592.77 | 0.36  | 0    | 115        | 1    | U K.MVGVPAALDMMMLTGR.S + 2 Oxidation (M)       |
|                                                              |       |              |                   | 1     | 797.59  | 1593.16  | 1592.79 | 0.37  | 0    | 112        | 1    | U R.FGGGNPELLTQMVSK.G + Oxidation (M)          |
|                                                              |       |              |                   |       | 814.10  | 1626.19  | 1625.85 | 0.33  | 0    | 91         | 1    | U R.TIEYLEEVAITFAK.G                           |
|                                                              |       |              |                   | 1     | 816.07  | 1630.13  | 1629.83 | 0.30  | 0    | 107        | 1    | U K.TLQEVTVQLSQAQR.I                           |
|                                                              |       |              |                   | 1     | 544.52  | 1630.55  | 1629.83 | 0.72  | 0    | 83         | 1    | U K.TLQEVTVQLSQAQR.I                           |
|                                                              |       |              |                   | 1     | 840.63  | 1679.26  | 1678.85 | 0.41  | 0    | 109        | 1    | U K.ADMVIEAVFEDLSLK.H                          |
|                                                              |       |              |                   |       | 848.58  | 1695.15  | 1694.84 | 0.31  | 0    | 90         | 1    | U K.ADMVIEAVFEDLSLK.H + Oxidation (M)          |
|                                                              |       |              |                   |       | 566.14  | 1695.41  | 1694.84 | 0.57  | 0    | 48         | 1    | U K.ADMVIEAVFEDLSLK.H + Oxidation (M)          |
|                                                              |       |              |                   | 1     | 922.05  | 1842.085 | 1841.81 | 0.28  | 0    | 120        | 1    | U K.TGIEQGS DAGYLCESQK.F + Carbamidomethyl (C) |
|                                                              |       |              |                   | 1     | 1004.18 | 2006.35  | 2006.11 | 0.24  | 0    | 131        | 1    | U K.TVLGTPEVLLGALPGAGGTQ R.L                   |
|                                                              |       |              |                   |       | 669.93  | 2006.77  | 2006.12 | 0.66  | 0    | 48         | 1    | U K.TVLGTPEVLLGALPGAGGTQ R.L                   |

|   |         |         |         |      |   |     |   |   |                                                                       |
|---|---------|---------|---------|------|---|-----|---|---|-----------------------------------------------------------------------|
| 1 | 674.64  | 2020.90 | 2020.11 | 0.79 | 0 | 93  | 1 | U | K.HLAILGAGLMGAGIAQVSVDK.G                                             |
| 1 | 679.78  | 2036.31 | 2036.11 | 0.20 | 0 | 91  | 1 | U | K.HLAILGAGLMGAGIAQVSVDK.G + Oxidation (M)                             |
| 1 | 1031.60 | 2061.19 | 2060.97 | 0.22 | 0 | 109 | 1 | U | R.DSIFSNLTGQLDYQGFEK.A                                                |
|   | 759.15  | 2274.42 | 2273.21 | 1.21 | 0 | 61  | 1 | U | K.MGLVDQLVEPLGPGLKPPEER.T                                             |
| 1 | 807.60  | 2419.77 | 2419.11 | 0.66 | 0 | 50  | 1 | U | K.ELHSEFSEVMNEIWASDQIR.S                                              |
|   | 812.84  | 2435.51 | 2435.11 | 0.40 | 0 | 41  | 1 | U | K.ELHSEFSEVMNEIWASDQIR.S + Oxidation (M)                              |
| 1 | 903.15  | 2706.43 | 2706.38 | 0.04 | 0 | 48  | 1 | U | K.STKPIVAAINSGCLGGGLEVAISCYR.I                                        |
|   | 922.12  | 2763.34 | 2763.27 | 0.07 | 1 | 41  | 1 | U | K.TGIEQGS DAGYLCE SQKFGE LVMTK.E + Carbamidomethyl (C); Oxidation (M) |
| 1 | 946.29  | 2835.85 | 2835.49 | 0.36 | 1 | 120 | 1 | U | K.KLDSLTT SFGFPVGAATLVDE VGVDVAK.H                                    |

**SQRD\_HUMAN Sulfide:quinone oxidoreductase, mitochondrial**

| Score | Mass  | Matched ions | Peptide sequences | Dupes | m/z obs | M exp   | M calc  | Delta | Miss | Pept score | Rank | U | Peptide                                    |
|-------|-------|--------------|-------------------|-------|---------|---------|---------|-------|------|------------|------|---|--------------------------------------------|
| 705   | 49929 | 28           | 10                |       |         |         |         |       |      |            |      |   |                                            |
|       |       |              |                   | 1     | 549.27  | 1096.53 | 1096.58 | -0.05 | 0    | 56         | 1    | U | R.VILAEFDYK.A                              |
|       |       |              |                   | 3     | 655.32  | 1308.62 | 1307.62 | 1.00  | 0    | 60         | 1    | U | K.IMYLSEAYFR.K + Oxidation (M)             |
|       |       |              |                   | 9     | 672.57  | 1343.13 | 1342.72 | 0.41  | 0    | 86         | 1    | U | K.TAAAVAAQSGILDR.T                         |
|       |       |              |                   | 2     | 724.65  | 1447.29 | 1447.73 | -0.44 | 0    | 76         | 1    | U | K.YADALQEIIQER.N                           |
|       |       |              |                   | 2     | 755.05  | 1508.08 | 1507.72 | 0.36  | 0    | 71         | 1    | U | K.AEPLTFPFDQSK.E                           |
|       |       |              |                   |       | 789.28  | 1576.54 | 1575.83 | 0.71  | 1    | 60         | 1    | U | K.KYADALQEIIQER.N                          |
|       |       |              |                   |       | 883.64  | 1765.26 | 1764.78 | 0.48  | 0    | 69         | 1    | U | K.YDGYTSCPLVTGYNR.V + Carbamidomethyl (C)  |
|       |       |              |                   |       | 947.74  | 1893.47 | 1892.87 | 0.59  | 1    | 66         | 1    | U | K.KYDGYTSCPLVTGYNR.V + Carbamidomethyl (C) |
|       |       |              |                   |       | 655.32  | 1962.93 | 1962.93 | 0.00  | 1    | 42         | 1    | U | K.CAGAPQKIMYLSEAYFR.K + Oxidation (M)      |
|       |       |              |                   | 1     | 1009.68 | 2017.34 | 2017.01 | 0.34  | 0    | 125        | 1    | U | R.NHYEVLVLGGGSGGITMAAR.M + Oxidation (M)   |

**ATPA\_HUMAN ATP synthase subunit  $\alpha$ , mitochondrial**

| Score | Mass  | Matched ions | Peptide sequences | Dupes | m/z obs | M exp   | M calc  | Delta | Miss | Pept score | Rank | U | Peptide                  |
|-------|-------|--------------|-------------------|-------|---------|---------|---------|-------|------|------------|------|---|--------------------------|
| 531   | 59714 | 16           | 7                 |       |         |         |         |       |      |            |      |   |                          |
|       |       |              |                   |       | 395.45  | 788.89  | 788.41  | 0.47  | 0    | 57         | 1    | U | R.VGSAAQTR.A             |
|       |       |              |                   |       | 500.42  | 998.82  | 999.57  | -0.75 | 0    | 46         | 1    | U | R.VLSIGDGIAR.V           |
|       |       |              |                   | 1     | 586.36  | 1170.71 | 1170.62 | 0.08  | 0    | 75         | 1    | U | R.VVDALGNAIDGK.G         |
|       |       |              |                   | 1     | 644.54  | 1287.06 | 1286.69 | 0.37  | 0    | 67         | 1    | U | K.HALIIYDDLK.Q           |
|       |       |              |                   |       | 659.21  | 1316.41 | 1315.73 | 0.68  | 0    | 89         | 1    | U | K.TSIAIDTIINQK.R         |
|       |       |              |                   | 2     | 788.64  | 1575.27 | 1574.78 | 0.49  | 0    | 120        | 1    | U | R.ILGADTSVDLEETG<br>R.V  |
|       |       |              |                   | 5     | 812.80  | 1623.59 | 1623.88 | -0.29 | 0    | 87         | 1    | U | R.TGAIVDVPVGEELL<br>GR.V |

**K6PP\_HUMAN 6-phosphofructokinase, platelet type**

| Score | Mass  | Matched ions | Peptide sequences | Dupes | m/z obs | M exp   | M calc  | Delta | Miss | Pept score | Rank | U | Peptide                           |
|-------|-------|--------------|-------------------|-------|---------|---------|---------|-------|------|------------|------|---|-----------------------------------|
| 922   | 85542 | 47           | 15                |       |         |         |         |       |      |            |      |   |                                   |
|       |       |              |                   |       | 427.91  | 853.81  | 853.44  | 0.37  | 0    | 41         | 1    | U | R.MGIYVGAK.V +<br>Oxidation (M)   |
|       |       |              |                   |       | 463.22  | 924.43  | 924.49  | -0.07 | 0    | 43         | 1    | U | K.LPDDQIPK.T                      |
|       |       |              |                   | 4     | 511.87  | 1021.72 | 1021.60 | 0.11  | 0    | 69         | 1    | U | R.VTILGHVQR.G                     |
|       |       |              |                   |       | 529.55  | 1057.09 | 1057.56 | -0.46 | 0    | 45         | 1    | U | K.FLEHLSGAGK.A                    |
|       |       |              |                   |       | 1058.50 | 1057.50 | 1057.56 | -0.06 | 0    | 61         | 1    | U | K.FLEHLSGAGK.A                    |
|       |       |              |                   |       | 530.63  | 1059.25 | 1059.51 | -0.26 | 1    | 48         | 1    | U | K.KQTDFEHR.I                      |
|       |       |              |                   | 1     | 534.35  | 1066.68 | 1066.55 | 0.13  | 0    | 50         | 1    | U | R.TFVLEVMGR.H +<br>Oxidation (M)  |
|       |       |              |                   | 1     | 557.87  | 1113.72 | 1113.55 | 0.17  | 0    | 50         | 1    | U | R.SFAGNLNTYK.R                    |
|       |       |              |                   |       | 396.29  | 1185.86 | 1185.65 | 0.21  | 1    | 41         | 1    | U | R.KFLEHLSGAGK.A                   |
|       |       |              |                   | 1     | 629.57  | 1257.12 | 1256.71 | 0.40  | 0    | 44         | 1    | U | R.NVIFQPVAELK.K                   |
|       |       |              |                   | 5     | 635.47  | 1268.93 | 1268.61 | 0.32  | 0    | 59         | 1    | U | K.YLEEIATQMR.T +<br>Oxidation (M) |
|       |       |              |                   | 4     | 697.38  | 1392.74 | 1392.72 | 0.01  | 0    | 91         | 1    | U | K.ELVVTQLGYDTR.V                  |
|       |       |              |                   | 7     | 706.52  | 1411.02 | 1411.69 | -0.67 | 0    | 72         | 1    | U | R.DLQSNVEHLTEK.<br>M              |

|   |        |         |         |       |   |     |   |   |                                                |
|---|--------|---------|---------|-------|---|-----|---|---|------------------------------------------------|
| 1 | 732.51 | 1463.00 | 1462.68 | 0.32  | 0 | 83  | 1 | U | R.MLAIYDGFDFGFAK.<br>G + Oxidation (M)         |
| 1 | 601.48 | 1801.41 | 1802.89 | -1.48 | 0 | 64  | 1 | U | K.AIGVLTSGGDAQG<br>MNAAVR.A +<br>Oxidation (M) |
| 3 | 902.63 | 1803.25 | 1802.89 | 0.36  | 0 | 102 | 1 | U | K.AIGVLTSGGDAQG<br>MNAAVR.A +<br>Oxidation (M) |
| 2 | 914.21 | 1826.40 | 1825.85 | 0.54  | 0 | 80  | 1 | U | K.NVLGHMQGGGAP<br>SPFDR.N + Oxidation<br>(M)   |
